# Supplementary material
Source: MDPI journal article supplement (https://www.mdpi.com/1999-4907/14/2/287)
Supplement: s1 [file s1]

### Differentiated unimodal

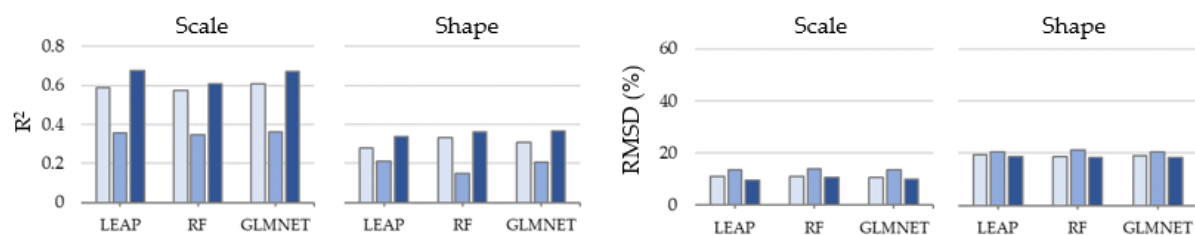

### Differentiated bimodal

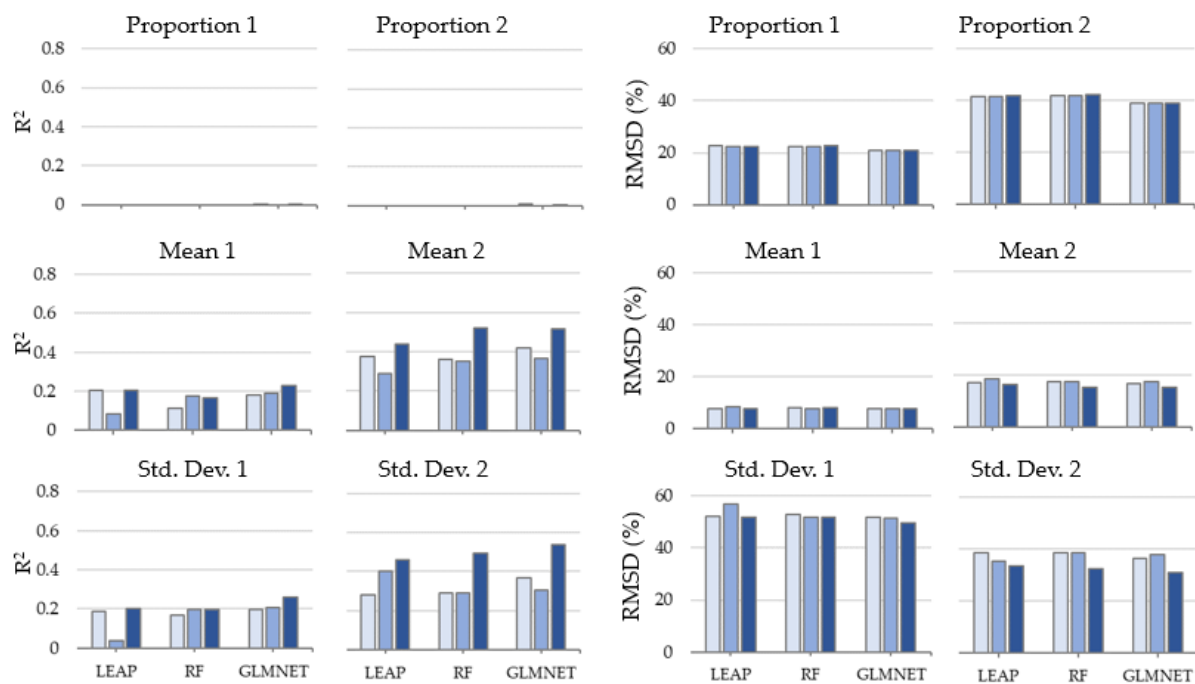

### Undifferentiated

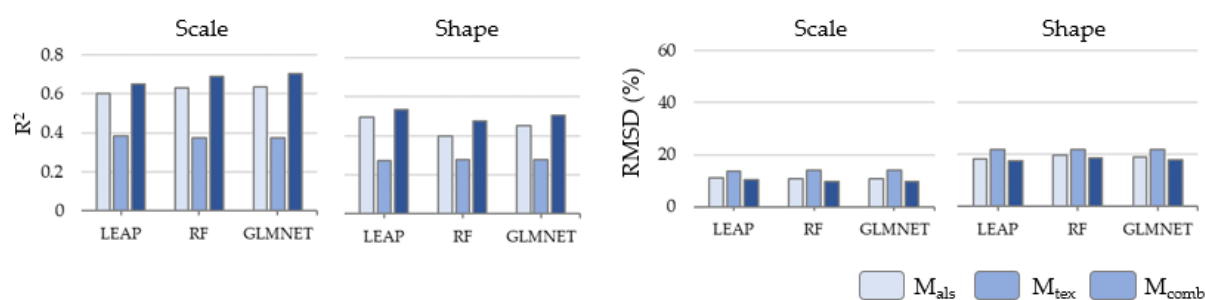

**Figure S1:** Average of 5 repeated cross-validation performance measures ( $R^2$ , RMSD%) derived during model development using the various SDD modality plot groupings, ALS metric sets and modelling techniques
